# Supplementary material for: Forest Products and Circular Economy Strategies: A Canadian Perspective
Source: MDPI journal article supplement (doi:10.3390/en15030673), 2022-01-18
Supplement: s1 [file s1]

Archive with 3 entries (3 files):
- S1 - Summary sheets.pdf
- S2 - Interview guide.pdf
- S3 - Interviewees profile and thematic analysis.pdf
